# Supplementary material
Source: HighWire-hosted journal article supplement (https://erj.ersjournals.com/content/58/2/2003024)
Supplement: inline-supplementary-material-1 [file inline-supplementary-material-1.pdf]

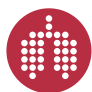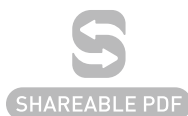

# Detection and characterisation of extracellular vesicles in exhaled breath condensate and sputum of COPD and severe asthma patients

Donatella Lucchetti<sup>1,6</sup>, Giuseppe Santini<sup>2,6</sup>, Luigi Perelli<sup>1,6</sup>, Claudio Ricciardi-Tenore<sup>1</sup>, Filomena Colella<sup>1</sup>, Nadia Mores<sup>2</sup>, Giuseppe Macis<sup>3</sup>, Andrew Bush<sup>4</sup>, Alessandro Sgambato<sup>5,7</sup> and Paolo Montuschi<sup>2,7</sup>

<sup>1</sup>Dept of Translational Medicine and Surgery, Faculty of Medicine, Catholic University of the Sacred Heart, Rome, Italy. <sup>2</sup>Pharmacology, Faculty of Medicine, Catholic University of the Sacred Heart, Rome, Italy. <sup>3</sup>Imaging Diagnostics, University Hospital Agostino Gemelli Foundation IRCCS, Rome, Italy. <sup>4</sup>Dept of Paediatrics, Imperial College London, London, UK. <sup>5</sup>Centro di Riferimento Oncologico della Basilicata (IRCCS-CROB), Rionero in Vulture, Italy. <sup>6</sup>These authors contributed equally to this study. <sup>7</sup>These authors share senior authorship of this article.

Paolo Montuschi ([paolo.montuschi@unicatt.it](mailto:paolo.montuschi@unicatt.it))

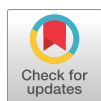

Shareable abstract (@ERSpublications)

**Small and medium extracellular vesicles, identified and characterised in exhaled breath condensate and induced sputum supernatants, might provide pathophysiological insights and novel biomarkers in severe asthma and COPD patients** <https://bit.ly/3fiTnXY>

**Cite this article as:** Lucchetti D, Santini G, Perelli L, *et al.* Detection and characterisation of extracellular vesicles in exhaled breath condensate and sputum of COPD and severe asthma patients. *Eur Respir J* 2021; 58: 2003024 [DOI: 10.1183/13993003.03024-2020].

This single-page version can be shared freely online.

Copyright ©The authors 2021. For reproduction rights and permissions contact [permissions@ersnet.org](mailto:permissions@ersnet.org)

Received: 5 Aug 2020  
Accepted: 22 March 2021

*To the Editor:*

Extracellular vesicles, nano-sized (20–1000 nm) membranous structures released from cells, play critical roles in both physiological and pathological processes [1]. Extracellular vesicles can be classified based on their size into small (sEVs; <200 nm, also known as exosomes) and medium (mEVs; >200 nm, also known as microvesicles) [1]. Extracellular vesicles might be a target for personalised medicine, given their content and biological origin [2]. Indeed, extracellular vesicles detected in various biological fluids, including sputum supernatants, mucus, epithelial lining fluid, the pulmonary circulation and bronchoalveolar lavage fluid represent a unique tool for both investigating the pathophysiology of respiratory disease and for biomarker discovery [2, 3].

Copyright ©The authors 2021. For reproduction rights and permissions contact [permissions@ersnet.org](mailto:permissions@ersnet.org)
